# Supplementary material for: Virus-templated magnetic composite hydrogels for surface immobilization of mimic-free-lipase
Source: Royal Society of Chemistry journal article supplement (doi:10.1039/d1nr03571a), 2021-01-01
Supplement: d1nr03571a1.pdf [file d1nr03571a1.pdf]

## Supporting Information

# **Virus-templated magnetic composite hydrogels for surface immobilization of mimic-free-lipase**

*Wenjing Qi, Huimin Yu\**

Department of Chemical Engineering, Tsinghua University, Beijing 100084, P. R. China.

\*Correspondence to: Huimin Yu, Department of Chemical Engineering, Tsinghua University,  
Beijing 100084, China.

Email: yuhm@tsinghua.edu.cn, tel: +8610-62795492, fax: +8610-62770304

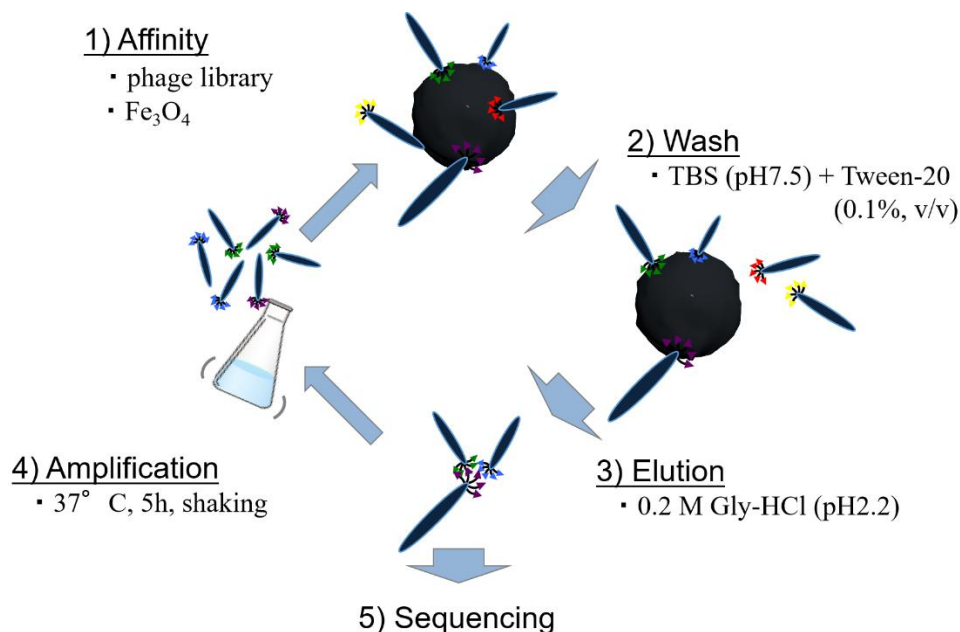

**Fig. S1** Procedure of biopanning for  $\text{Fe}_3\text{O}_4$ -specific affinity peptides (FAP)

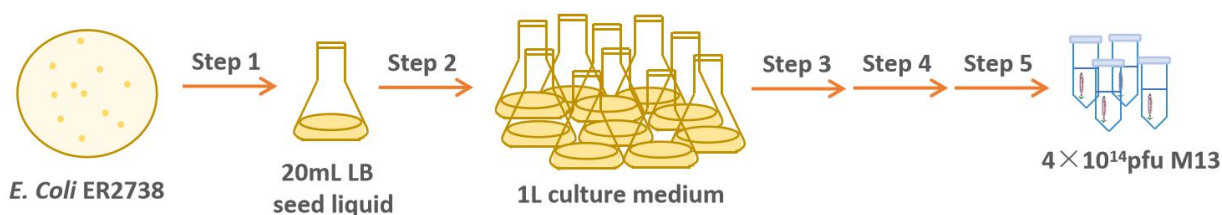

**Fig. S2** Middle-scale culture procedure of M13 phages. **Step 1:** One single colony of host bacteria ER2738 was cultivated in 20 mL LB liquid culture medium at 37 °C, 200 rpm for 12h. **Step 2:**  $3 \times 10^{12}$  pfu M13 phages and 1 mL ER2738 seed liquid were inoculated in 100 mL LB/300ml shaking flasks (1 L LB in total) at 37 °C, 200 rpm for 12h. **Step 3:** The culture medium was centrifuged to remove the cell pellet of bacteria ER2738 at 4 °C, 8000 rpm for 10 min. **Step 4:** Phages remaining in the supernatant were deposited by adding 1/6 volume of PEG/NaCl solution (20 % (w/v) PEG-8000 and 2.5 M NaCl) and refrigerated for 8h at 4 °C, **Step 5:** The phages were harvested by centrifuging at 4 °C, 8000 rpm for 15 min. The solutions with different M13 phage concentration were obtained by resuspension of the pellets in different amounts of deionized water.

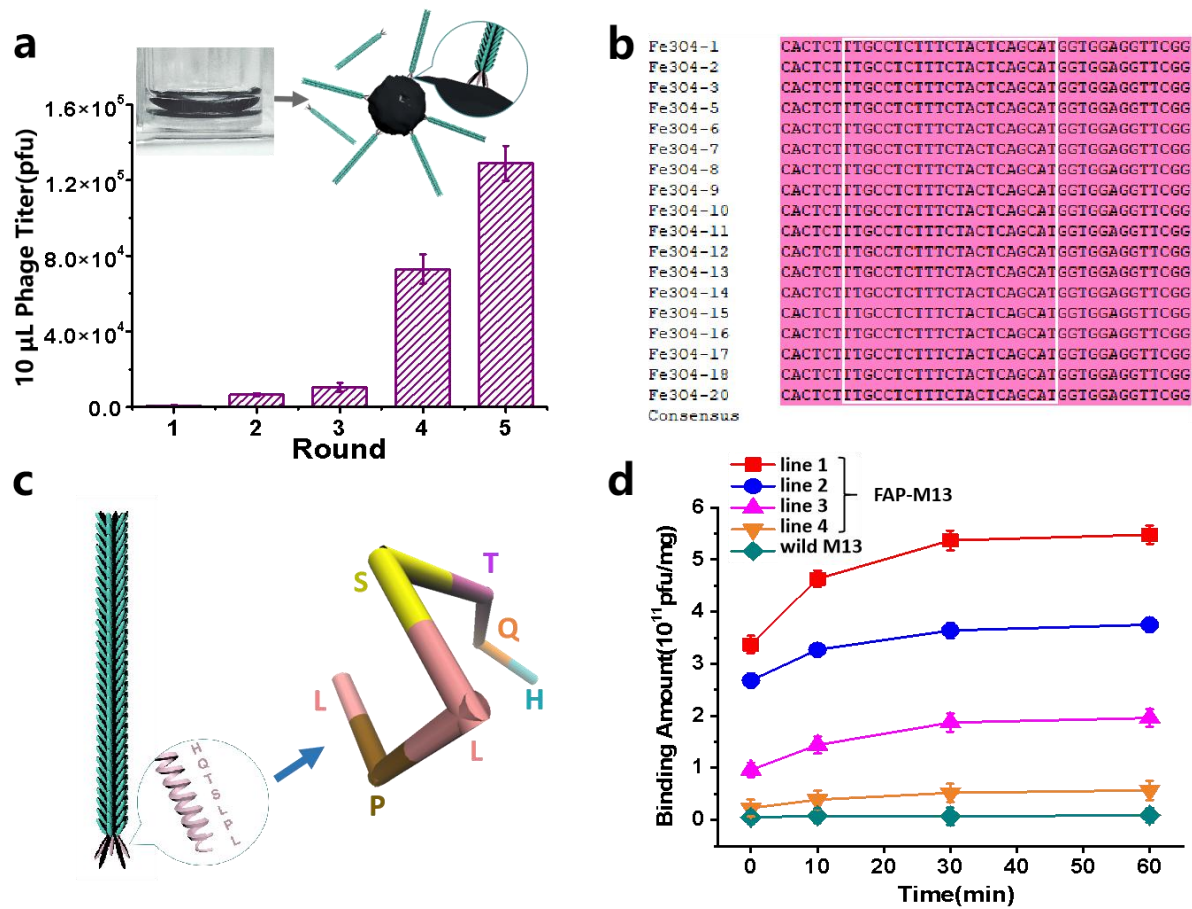

**Fig. S3** Biopanning of FAP-M13 and identification of the FAP peptide. (a) The titer of the binding M13 was enhanced round-by-round from the 1st to 5th cycle of selection. (b) Sequencing result of 20 colonies from the round-5 biopanning, 7-mer amino acid sequences were circled in the white line. (c) Three-dimensional structure of the optimal FAP peptide predicted by the 3Dpro model of Search Protein Predictor (<http://scratch.proteomics.ics.uci.edu/>). (d) Influence of phage concentration and binding time on the binding amount of FAP-M13 with bare Fe<sub>3</sub>O<sub>4</sub>. After mixing Fe<sub>3</sub>O<sub>4</sub> (0.5 mg, 600 nm) and FAP-M13 phages (2×10<sup>12</sup> pfu), the PB buffer was added to obtain varying total volumes (50 µL, 100 µL, 150 µL, and 200 µL), thereby changing the final concentration of FAP-M13 phages (line 1: 4×10<sup>13</sup> pfu/mL, line 2: 2×10<sup>13</sup> pfu/mL, line 3: 1.33×10<sup>13</sup> pfu/mL, line 1: 1×10<sup>13</sup> pfu/mL). Wild M13 phages (2×10<sup>12</sup> pfu, 50 µL) without the special pIII protein were also mixed with Fe<sub>3</sub>O<sub>4</sub> (0.5 mg, 600 nm) as a control. The

mixture was placed in a metal bath shaker for varied time at 37 °C, 200 rpm. For one Fe<sub>3</sub>O<sub>4</sub> particle with diameter of 600 nm, its surface area is about  $1.1 \times 10^6$  nm<sup>2</sup> and its mass is about  $5.9 \times 10^{-10}$  mg, thus one Fe<sub>3</sub>O<sub>4</sub> particle can accommodate theoretical maximum about  $3 \times 10^4$  pfu of FAP-M13 whose cross sectional area is about 33.2 nm<sup>2</sup>. For the line 1 in Figure 3d, the quantified binding amount was  $5.3 \times 10^{11}$  pfu FAP-M13/mg Fe<sub>3</sub>O<sub>4</sub>, in other words, on a single Fe<sub>3</sub>O<sub>4</sub> particle, about 318 pfu FAP-M13 were binded. The wild M13 could not attach on the bare Fe<sub>3</sub>O<sub>4</sub> nanoparticles as FAP-M13 did, and both phage concentration and binding time influenced the binding amount of FAP-M13 towards bare Fe<sub>3</sub>O<sub>4</sub>. The optimal high concentration of FAP-M13 (line 1:  $4 \times 10^{13}$  pfu/mL) was beneficial for the binding, and the optimal binding time was 30 min.

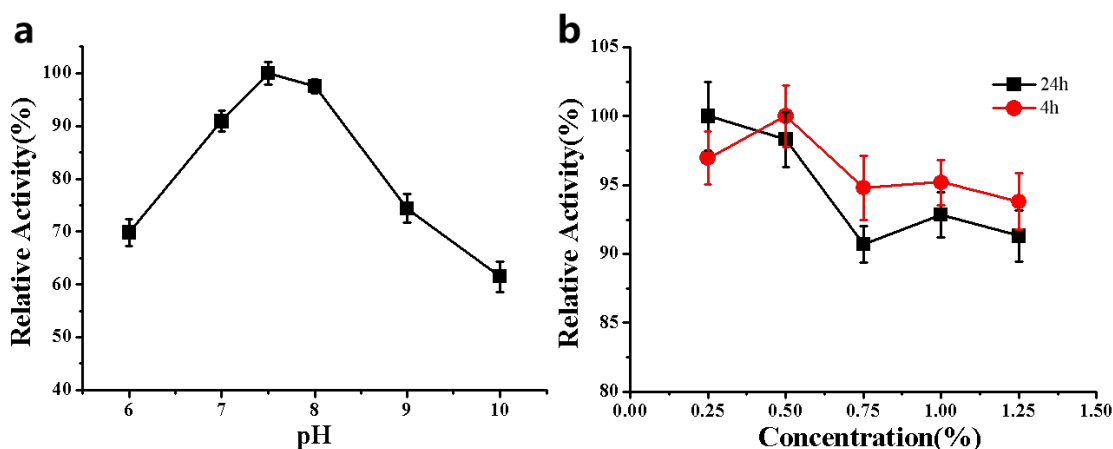

**Fig. S4** Optimization of magnetic composite hydrogel preparation conditions. (a) Optimization of crosslinking pH under 0.5% glutaraldehyde at 37 °C, 200rpm, 4h. (b) Optimization of glutaraldehyde final concentration for crosslinking under 4h or 24h at pH=7.5, 37 °C, 200rpm.

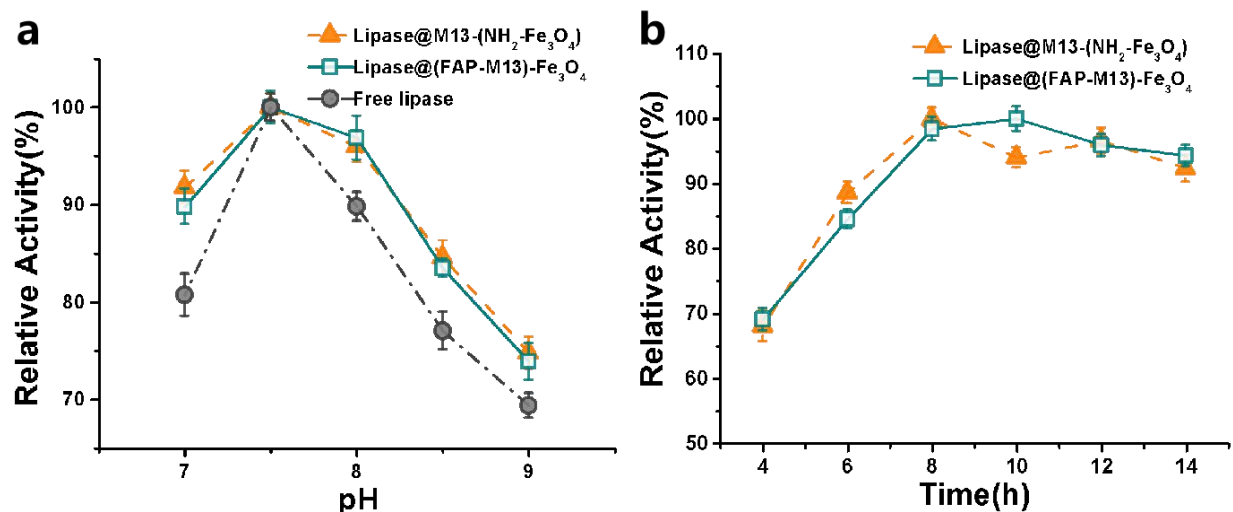

**Fig. S5** Optimization of immobilization conditions. (a) Optimization of immobilization pH. PB buffer of varied pH. 100  $\mu$ L magnetic carrier and 100  $\mu$ L lipase (5 mg/mL) were mixed at varied pH. After 12 h of immobilization at 37  $^{\circ}$ C, 200 rpm, the immobilized lipase was recovered and the residual activity was measured at 37  $^{\circ}$ C, pH=7.5 for 10 min. (b) Optimization of immobilization time at pH=7.5, 37  $^{\circ}$ C, 200 rpm.

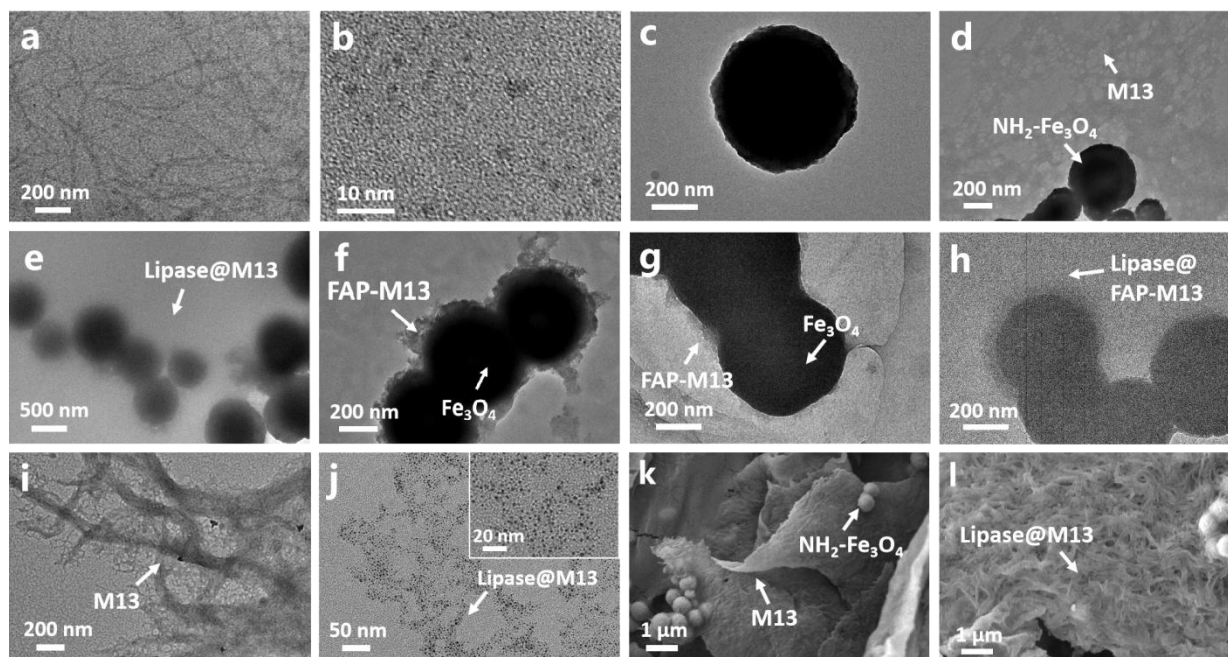

**Fig. S6** The structures of the magnetic virus hydrogels and the MFLs. The TEM images of (a) FAP-M13; (b) lipase; (c)  $\text{Fe}_3\text{O}_4$ . Additional representative TEM images of (d) M13-( $\text{NH}_2\text{-Fe}_3\text{O}_4$ ), arrows point to crosslinked M13 hydrogel network and  $\text{NH}_2\text{-Fe}_3\text{O}_4$ ; (e) lipase@M13-( $\text{NH}_2\text{-Fe}_3\text{O}_4$ ), arrow points to lipase@M13 surrounding  $\text{NH}_2\text{-Fe}_3\text{O}_4$ ; (f) FAP-M13 affinity binding on  $\text{Fe}_3\text{O}_4$  particle, and high phage concentration of FAP-M13 was used to observe obvious phage gel layer, arrows point to FAP-M13 layer and bare  $\text{Fe}_3\text{O}_4$ ; (g) (FAP-M13)- $\text{Fe}_3\text{O}_4$ , arrows point to crosslinked FAP-M13 hydrogel network and bare  $\text{Fe}_3\text{O}_4$ ; (h) lipase@(FAP-M13)- $\text{Fe}_3\text{O}_4$ , arrow points to lipase@FAP-M13 surrounding  $\text{Fe}_3\text{O}_4$ . The negative staining TEM images of (i) M13 hydrogel, arrows point to crosslinked M13 hydrogel network; (j) lipase@M13 hydrogel, arrow points to lipase@M13. The SEM images of (k) M13-( $\text{NH}_2\text{-Fe}_3\text{O}_4$ ), arrows point to crosslinked M13 hydrogel network and  $\text{NH}_2\text{-Fe}_3\text{O}_4$ ; (l) lipase@M13-( $\text{NH}_2\text{-Fe}_3\text{O}_4$ ), arrow points to lipase@M13 surrounding  $\text{NH}_2\text{-Fe}_3\text{O}_4$ .

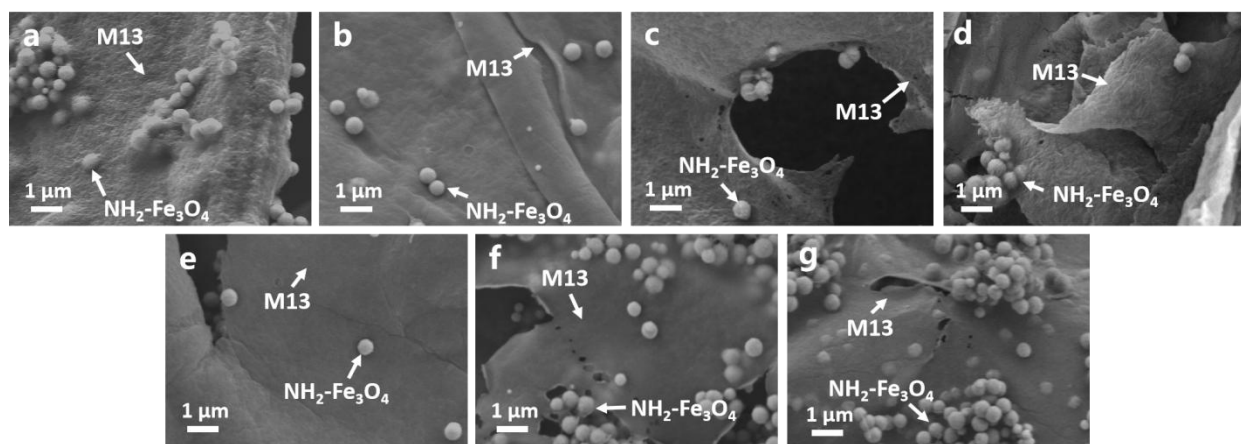

**Fig. S7** The SEM images of the structures of M13-(NH<sub>2</sub>-Fe<sub>3</sub>O<sub>4</sub>) magnetic virus hydrogels under different crosslinking pH including (a) pH = 4, (b) pH = 6, (c) pH = 7, (d) pH = 7.5, (e) pH = 8, (f) pH = 9, (g) pH = 11. The rest of preparation conditions were 0.5% glutaraldehyde at 37 °C, 200rpm, 4h. Arrows point to crosslinked M13 hydrogel network and NH<sub>2</sub>-Fe<sub>3</sub>O<sub>4</sub>.

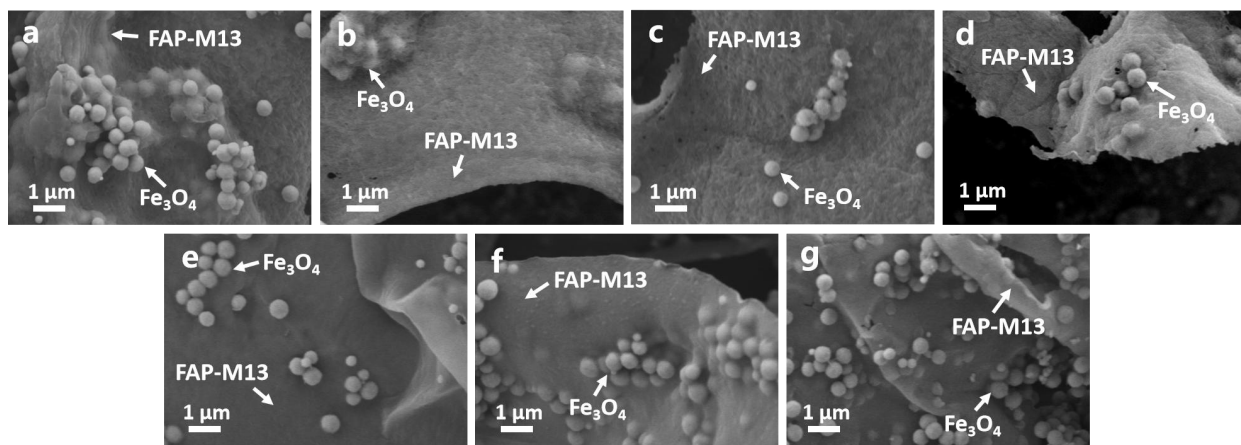

**Fig. S8** The SEM images of the structures of (FAP-M13)-Fe<sub>3</sub>O<sub>4</sub> magnetic virus hydrogels under different crosslinking pH including (a) pH = 4, (b) pH = 6, (c) pH = 7, (d) pH = 7.5, (e) pH = 8, (f) pH = 9, (g) pH = 11. The rest of preparation conditions were 0.5% glutaraldehyde at 37 °C, 200rpm, 4h. Arrows point to crosslinked FAP-M13 hydrogel network and bare Fe<sub>3</sub>O<sub>4</sub>.

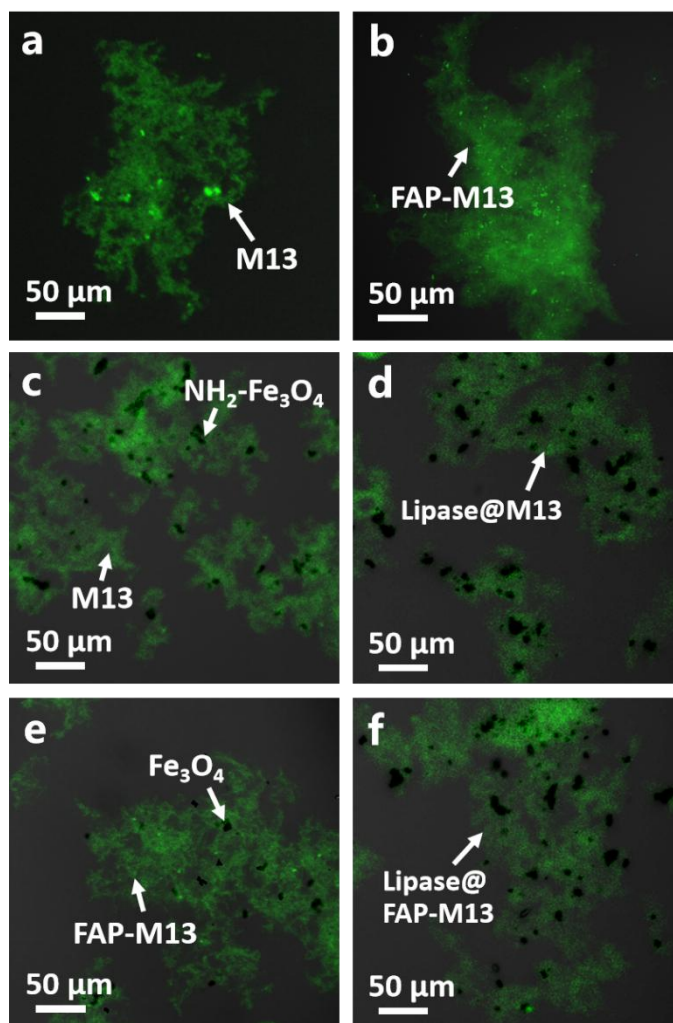

**Fig. S9** The structures of the magnetic virus hydrogels and the MFLs. The confocal laser scanning microscopy (CLSM) images of (a) M13 hydrogel, arrow points to crosslinked M13 hydrogel network; (b) FAP-M13 hydrogel, arrow points to crosslinked FAP-M13 hydrogel network; (c) M13-(NH<sub>2</sub>-Fe<sub>3</sub>O<sub>4</sub>), arrows point to crosslinked M13 hydrogel network and NH<sub>2</sub>-Fe<sub>3</sub>O<sub>4</sub>; (d) lipase@M13-(NH<sub>2</sub>-Fe<sub>3</sub>O<sub>4</sub>), arrow points to lipase@M13 surrounding NH<sub>2</sub>-Fe<sub>3</sub>O<sub>4</sub>; (e) (FAP-M13)-Fe<sub>3</sub>O<sub>4</sub>, arrows point to crosslinked FAP-M13 hydrogel network and bare Fe<sub>3</sub>O<sub>4</sub>; (f) lipase@(FAP-M13)-Fe<sub>3</sub>O<sub>4</sub>, arrow points to lipase@FAP-M13 surrounding Fe<sub>3</sub>O<sub>4</sub>. The autofluorescence of the hydrogels and the MFLs was the result of the reactions between proteins (phages and lipases) and glutaraldehyde.

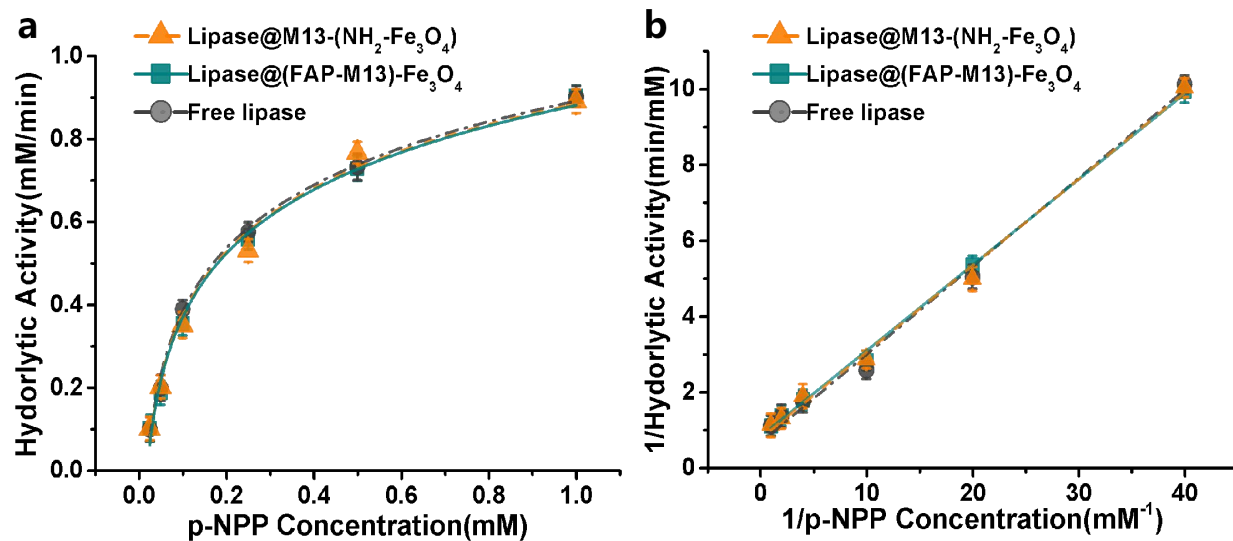

**Fig. S10** Michaelis-Menten plots of the MFLs and free lipase. (a) Hydrolytic activity of free lipase and immobilized lipase at varied p-NPP concentration. (b) Michaelis-Menten kinetics evaluated through Lineweaver Burk plots.
